# Supplementary material
Source: PubMed Central journal article supplement (PMC2669391)
Supplement: 0812883106_0812883106SI.pdf [file 0812883106_0812883106SI.pdf]

# Supporting Information

Purwantini and Mukhopadhyay 10.1073/pnas.0812883106

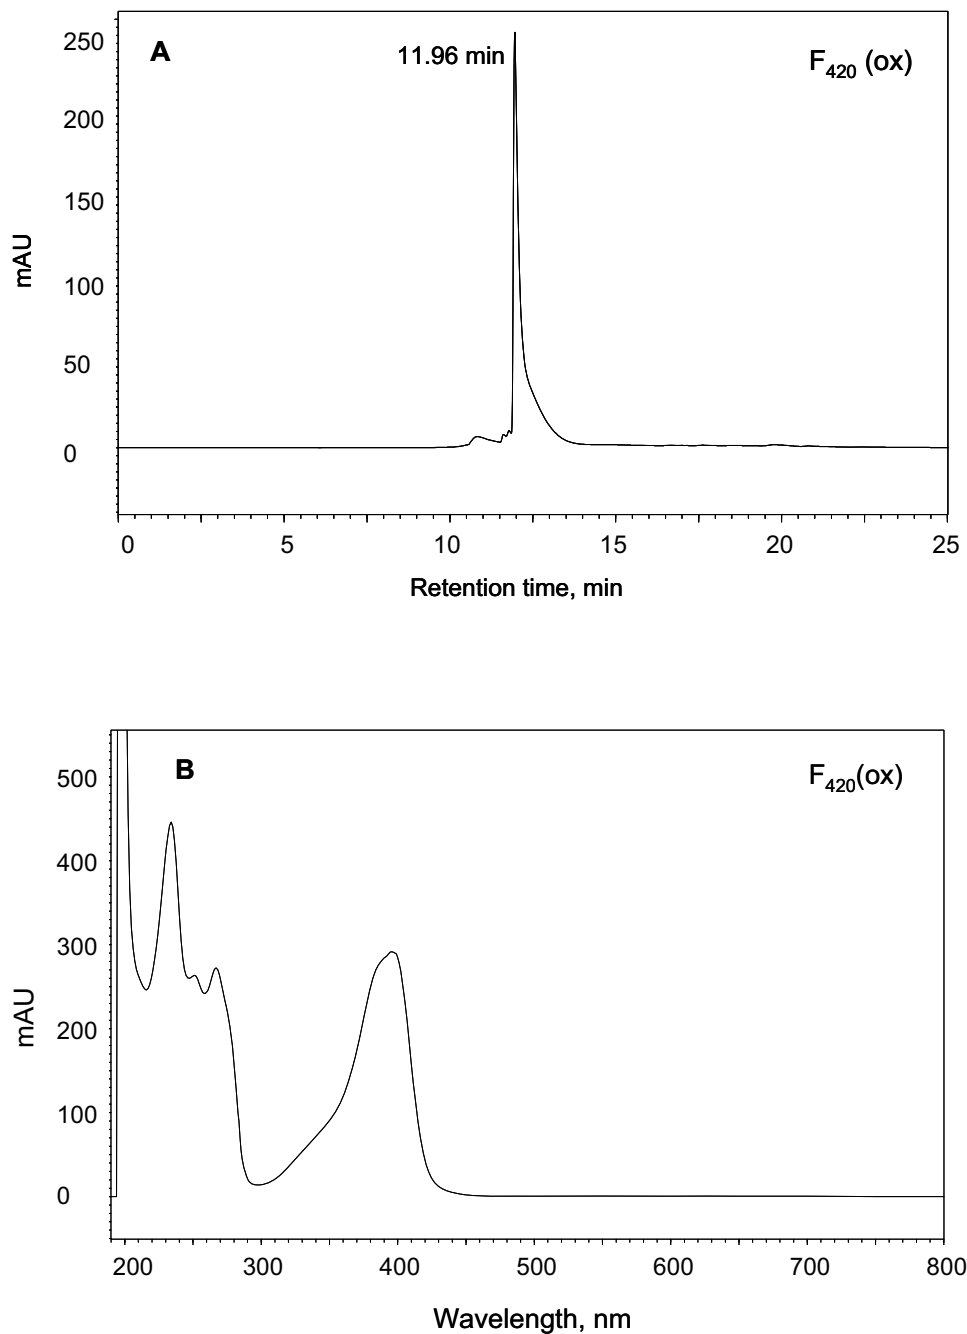

**Fig. S1.** Reversed-phase HPLC analysis of the deazaflavin products generated in a reaction between  $\text{NO}_2$  and  $\text{H}_2\text{F}_{420}$ . The analysis was performed as described [Choi KP, Bair TB, Bae YM, Daniels L (2001) Use of transposon Tn5367 mutagenesis and a nitroimidazopyran-based selection system to demonstrate a requirement for *fbtA* and *fbtB* in coenzyme  $\text{F}_{420}$  biosynthesis by *Mycobacterium bovis* BCG. *J Bacteriol* 183:7058–661] with the following changes. A Vydac analytical  $\text{C}_{18}$  column ( $4.6 \times 250$  mm; particle size  $5 \mu\text{m}$ ; catalog no. 218T54; Separation Group) was used. Solvent A was 2% acetonitrile in 25 mM sodium acetate (pH 4.7), and solvent B was acetonitrile, and the flow rate was 0.5 mL/min. After the application of a sample under 100% solvent A, the following gradients of solvent B in solvent A were applied: 0–5 min, 0–5% B; 5–10 min, 5–15% B; 15–20 min, 25% B (isocratic); 20–25 min, 25–0% B. A photodiode array detector was used for monitoring the elution and for obtaining the UV-visible spectra for the eluted compounds. Both  $\text{F}_{420}$  and  $\text{F}_{420}\text{H}_2$  were eluted at 11.96 min.

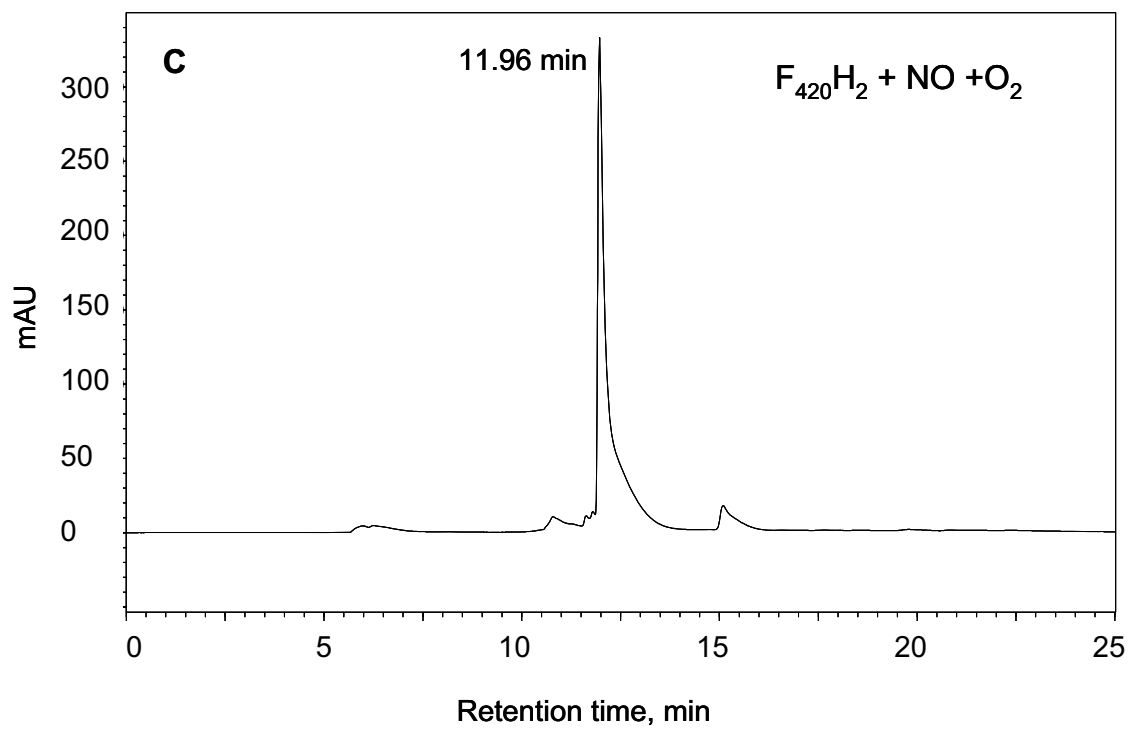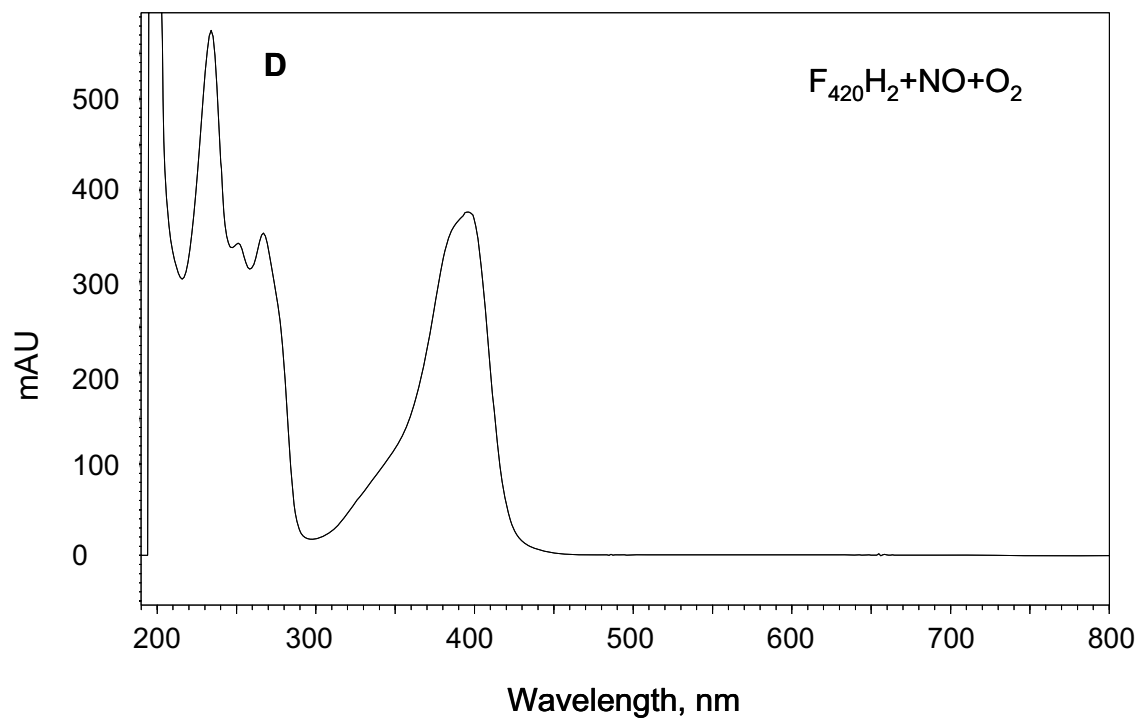

Fig. S1 continued.

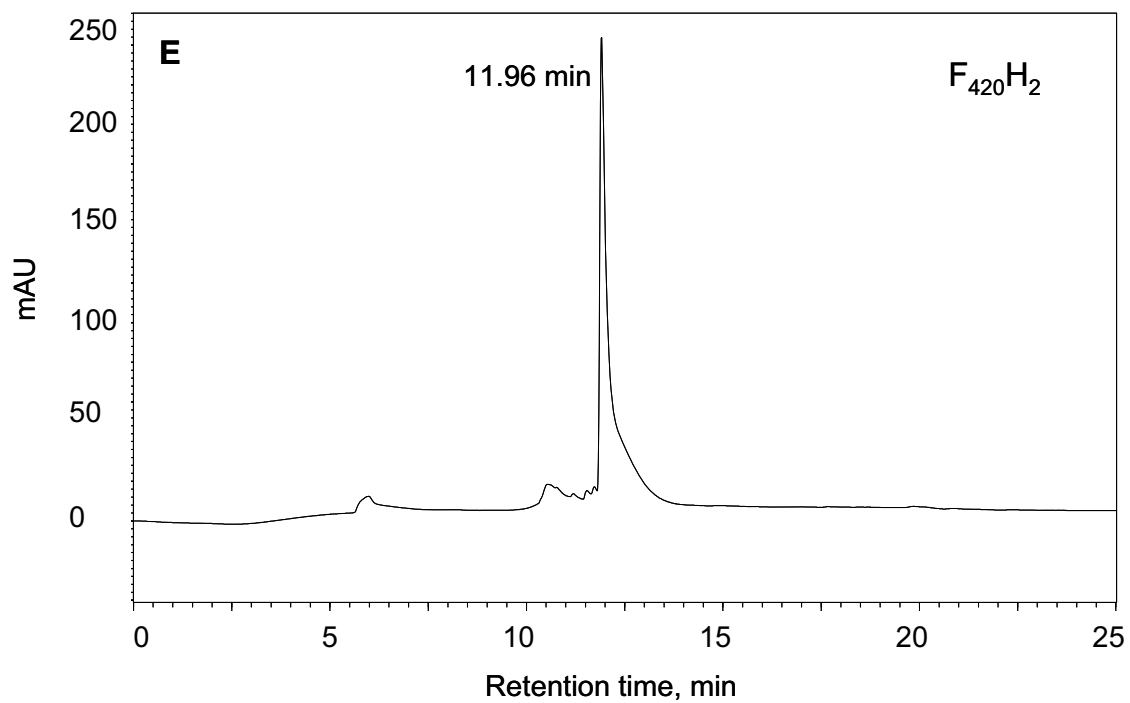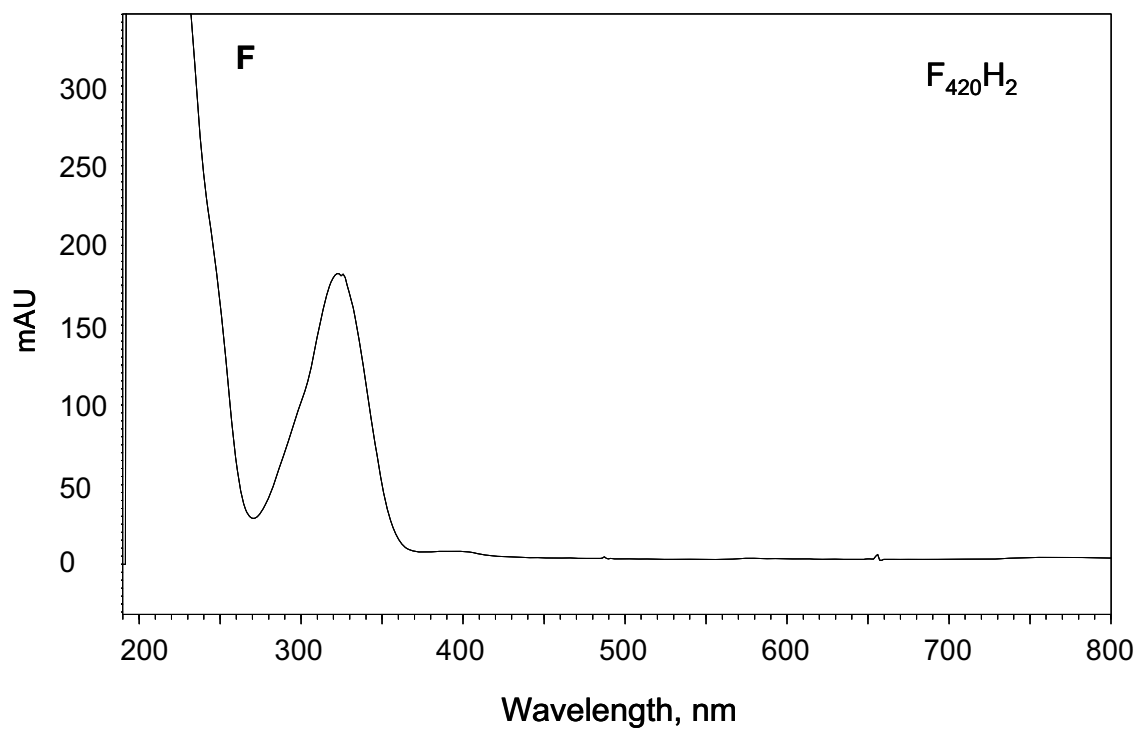

Fig. S1 continued.
